# Supplementary material
Source: PubMed Central journal article supplement (PMC4291542)
Supplement: NIHMS642325-supplement-1.pdf [file NIHMS642325-supplement-1.pdf]

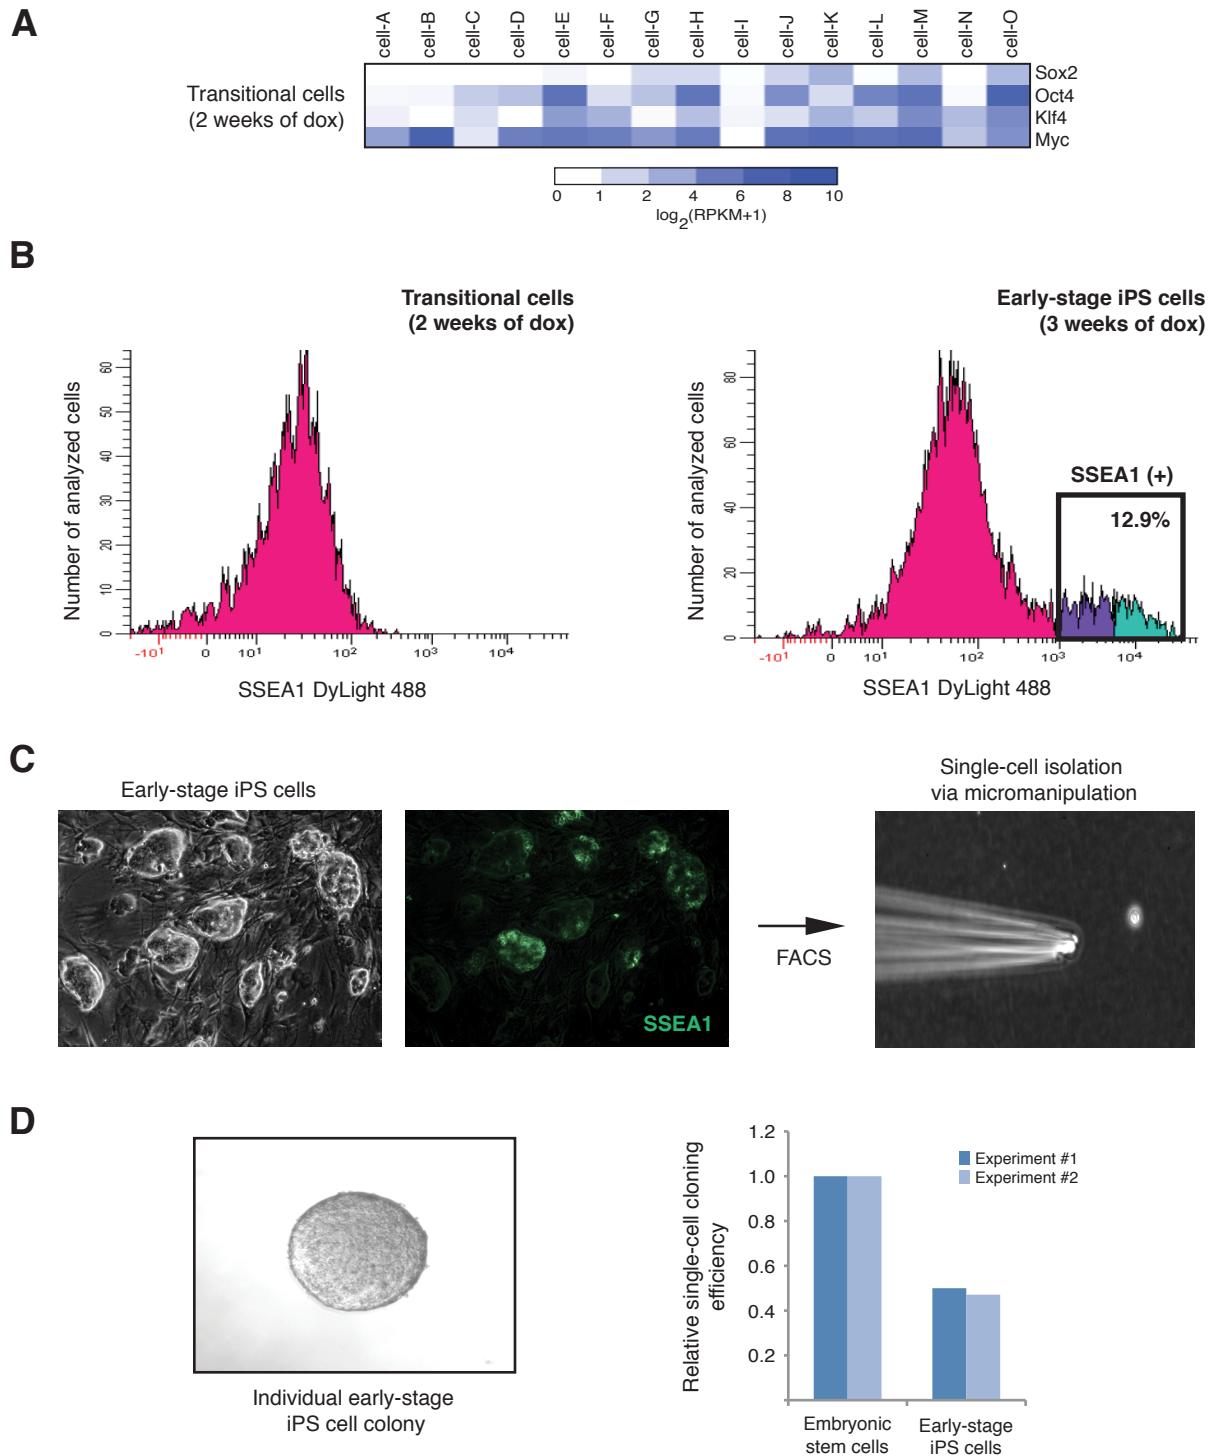

**Figure S1, Related to Figure 1. Characterization of transitional and early-stage iPS cells**  
 (A) Heatmap of OSKM transgene expression, as determined by single-cell RNA-seq. RPKM, reads per kilobase per million mapped reads. dox, doxycycline. (B) Flow cytometry analysis of SSEA1 expression. (C) Phase contrast and fluorescent images of early-stage iPS cell colonies stained with anti-SSEA1 and single-cell isolation using micromanipulation. (D) Phase contrast image of an individual iPS cell colony seeded by a single cell sorted into 96-plate format and relative single-cell cloning efficiencies of ES and early-stage iPS cells.

**A**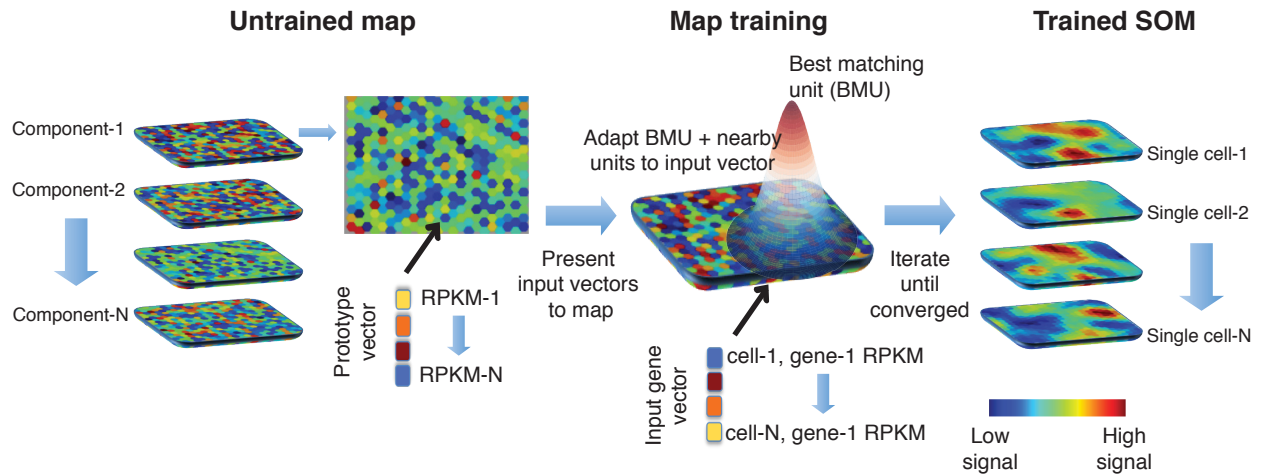**B**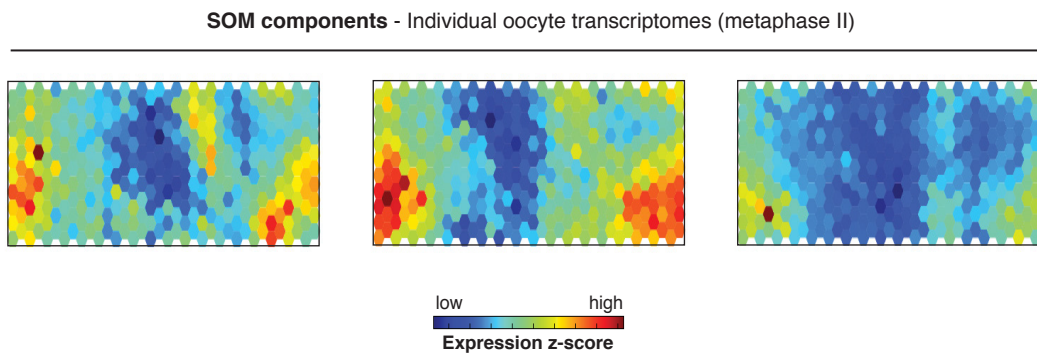

**Figure S2, Related to Figure 2. Self-organizing map (SOM) and oocyte SOM components**  
 (A) A gene is clustered according to the minimum distance of its expression vector from prototype vectors assigned to units in a 2D grid. Initial vectors can be chosen in a variety of ways. In this work, they are initialized by mapping the first two principal components of the data onto the grid. Training proceeds by incrementally moving each prototype toward input vectors that map near it, using a weighting that decreases with map distance from the best matching unit (BMU). The trained SOM consists of prototypes adapted to input data and exhibits spatial organization of units in larger-scale clusters across the grid. Colorbar represents  $\log_2$  transformation of normalized data vectors, where normalization is performed on a gene-by-gene basis by subtracting the vector mean and dividing by its standard deviation.  
 (B) Single-cell oocyte transcriptomes depicted as individual components of the self-organizing map (SOM).

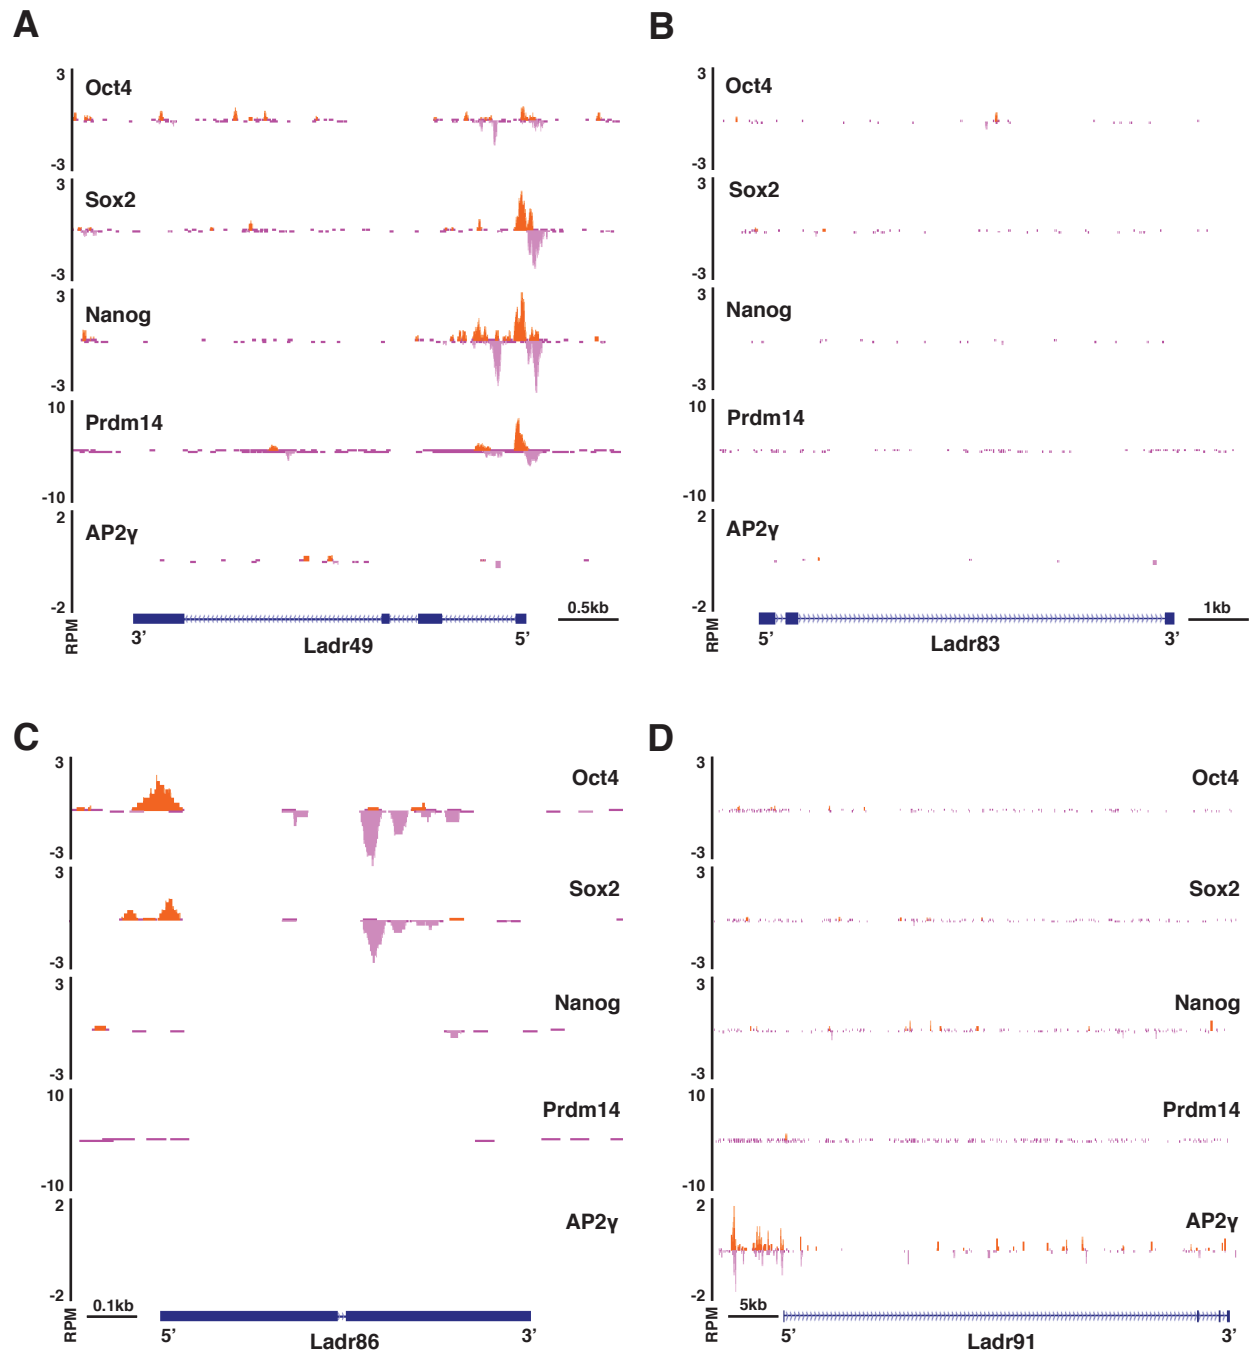

**Figure S3, Related to Figure 4. LncRNA regulation by pluripotency and germ cell factors**  
 Genome browser ChIP-seq profiles of the Ladr49 (A), Ladr83 (B), Ladr86 (C), and Ladr91 (D) lncRNA genes. RPM, reads per million.

**A**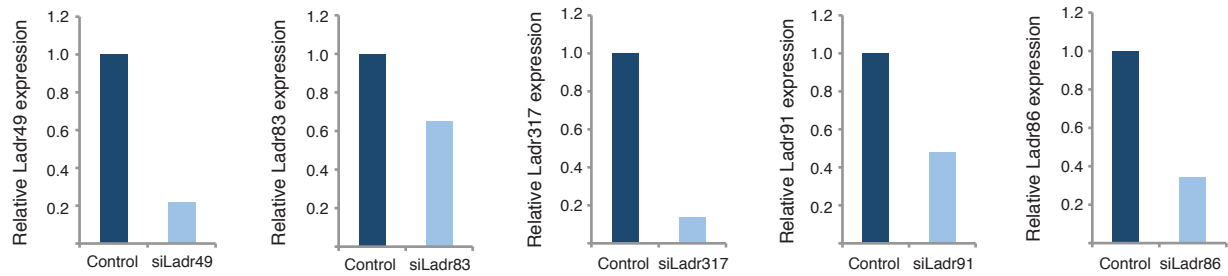**B**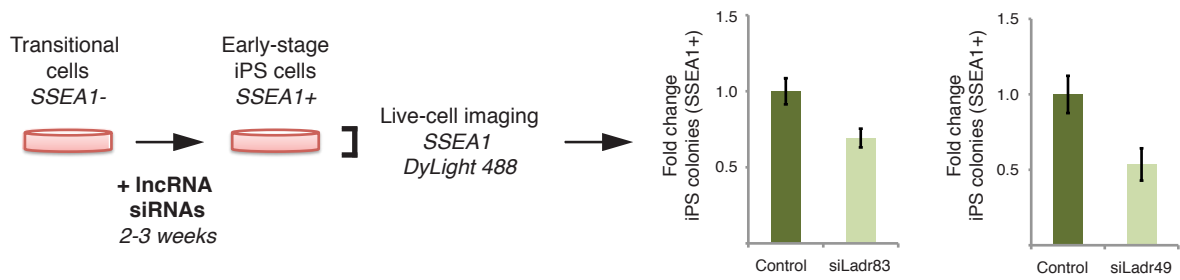

**Figure S4, Related to Figure 5. Effects of Ladr knockdown on reprogramming efficiency**  
(A) Relative expression of lncRNAs in iPS cells transfected with control or Ladr-specific siRNAs, as determined by RNA-seq. (B) Fold-change in the number of *SSEA1*<sup>+</sup> iPS cell colonies in reprogramming cells transfected with control or Ladr-specific siRNAs.

**A**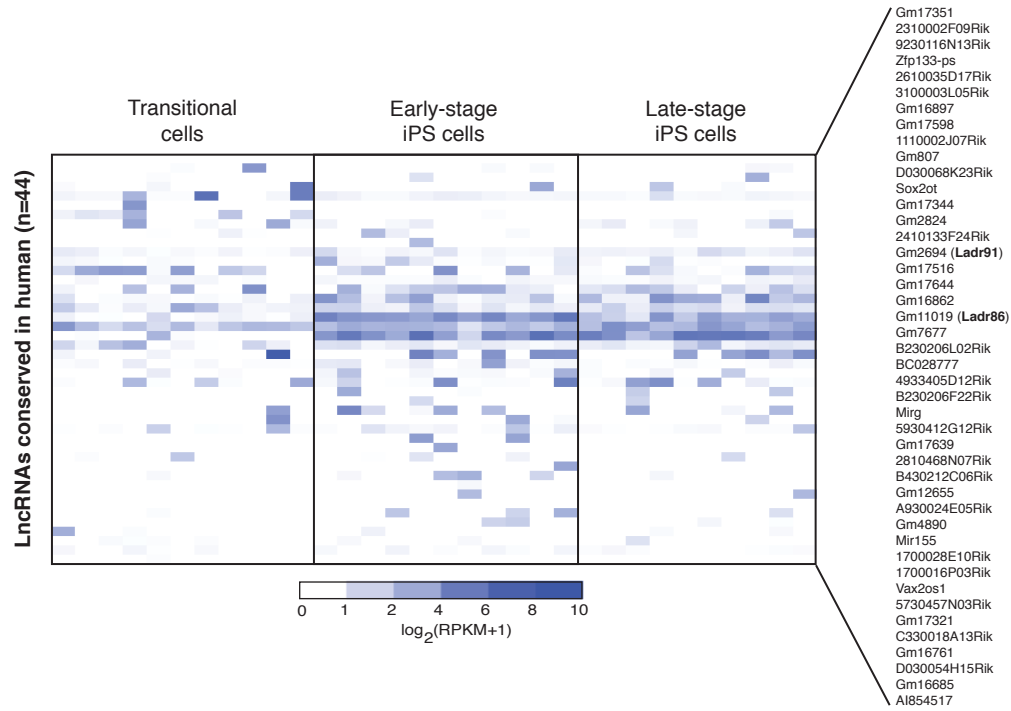**B**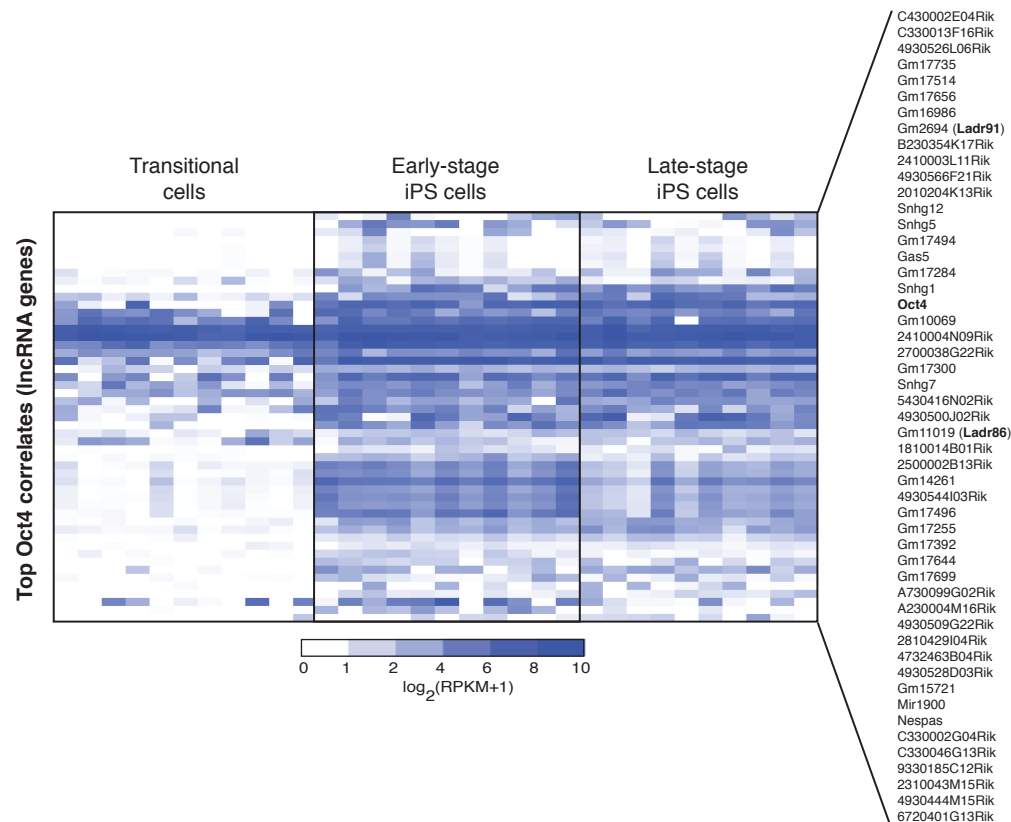

**Figure S5, Related to Figure 7. Conserved lncRNAs and top lncRNA correlates of *Oct4***  
 (A) Heatmap of activated lncRNAs conserved in human, as determined by liftOver analysis and single-cell RNA-seq. (B) Heatmap of lncRNA genes that correlate most highly (Pearson correlation) with *Oct4* expression during the reprogramming time course, as determined by single-cell RNA-seq. RPKM, reads per kilobase per million mapped reads.

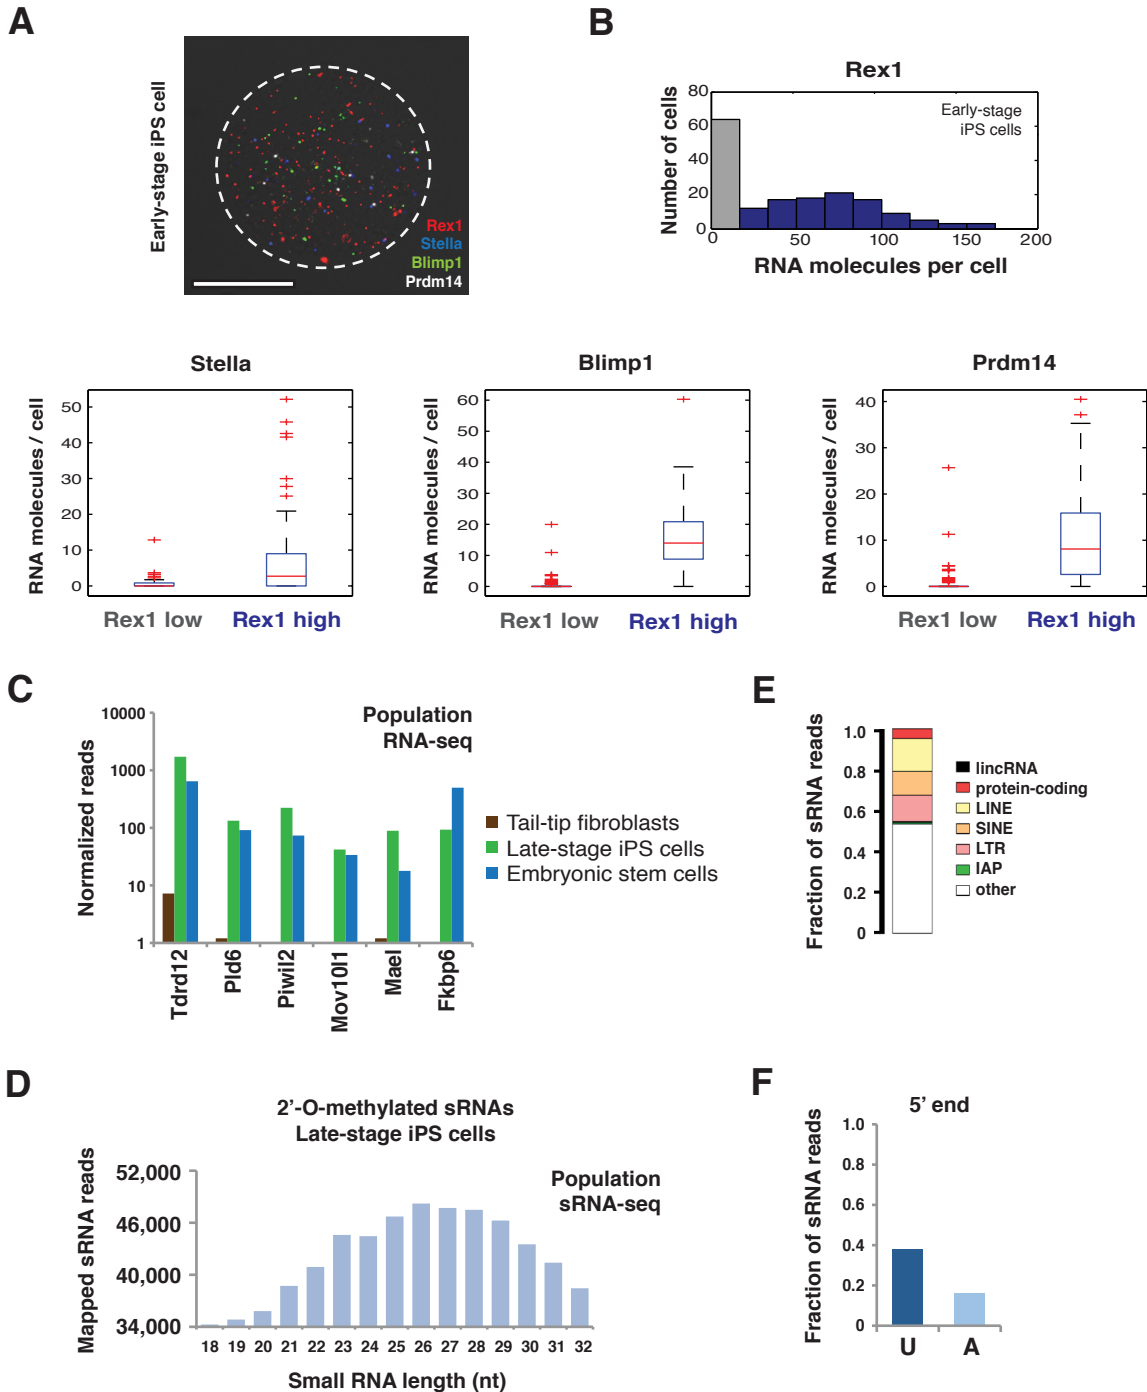

**Figure S6, Related to Figure 7. Germ cell genes and 2'-O-methylated sRNAs in iPS cells**  
 (A) Representative fluorescence image of a single early-stage iPS cell using 4-color smFISH. Scale bar, 10  $\mu$ m. (B) Histogram and box plots showing RNA molecules per cell for each indicated gene, as determined by smFISH. Red cross symbols indicate outliers. (C) Effective read counts (normalized reads) for piRNA pathway genes in indicated cell types, as determined by population level RNA-seq. (D) Size distribution of 2'-O-methylated small RNAs (sRNAs) in iPS cells, as determined by population level small RNA-seq. (E) Genomic annotations of 2'-O-methylated small RNAs. (F) Fraction of 2'-O-methylated small RNAs that begin with a 5' U or A.

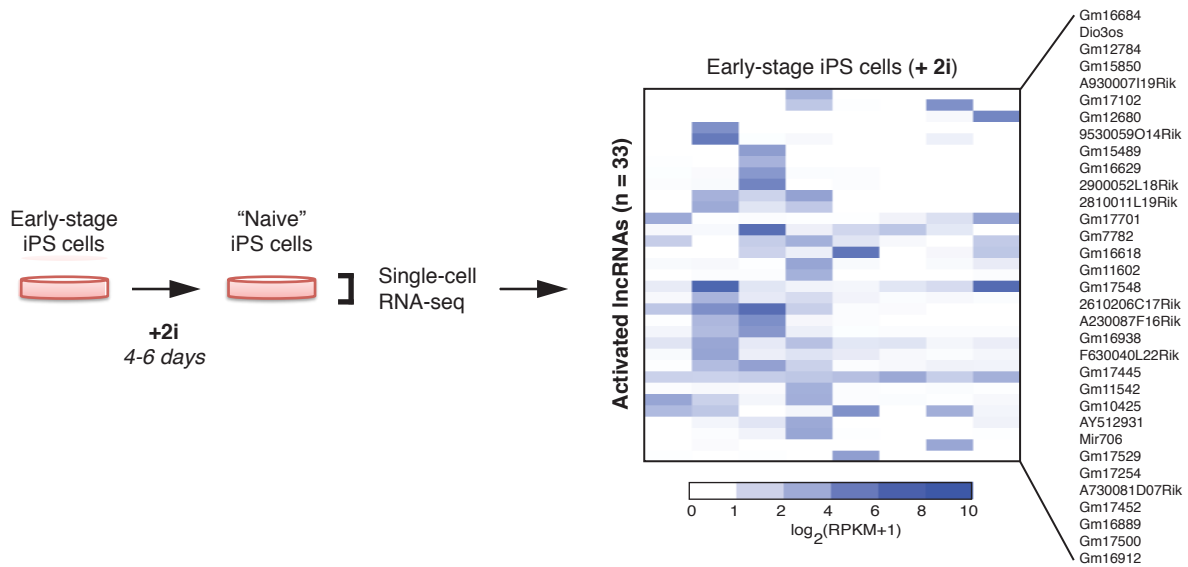

**Figure S7, Related to Figure 7. LncRNAs activated under “2i” conditions in iPS cells**  
 Schematic illustration of “2i” experiments and heatmap of lncRNAs activated (>10 RPKM) in early-stage iPS cells cultured in “2i” conditions for 4-6 days, as determined by single-cell RNA-seq. RPKM, reads per kilobase per million mapped reads.

**Table S1, Related to Figure 2. Self-organizing map clustering of lncRNAs**

| SOM Cluster: 0 | SOM Cluster: 2 | SOM Cluster: 7 | SOM Cluster: 9 | SOM Cluster: 21 | SOM Cluster: 25 |
|----------------|----------------|----------------|----------------|-----------------|-----------------|
| Atp10d         | Meg3           | Gm10069        | B230354K17Rik  | Ttc28           | 8430429K09Rik   |
| C230037L18Rik  | Gm17291        | Gm17644        | 5430416N02Rik  | 1810034E14Rik   | Gm9917          |
| A930029G22Rik  | R74862         | Gm11019        | Gm16624        | Gpr137b-ps      | Gm14488         |
| 2310002F09Rik  | 4930513N10Rik  | Gm17290        | Gm11974        | 9330179D12Rik   | Enox            |
| A730020E08Rik  | Gm17682        | Gm16627        | C530005A16Rik  | Gm10785         | Bbip1           |
| A330040F15Rik  | Gm17516        | Gm14261        | Gt(ROSA)26Sor  | Gm16617         | Gm16867         |
| 3100003L05Rik  | Gm16929        | 4930509G22Rik  | Nespas         | 6330418K02Rik   | D430036J16Rik   |
| Gm16898        | A930006K02Rik  | 2410003L11Rik  | Gm12976        | Gm16882         | Gm16897         |
| 2410133F24Rik  | BC028777       | 4930444M15Rik  | 2410004N09Rik  | 2900076A07Rik   | 2010001A14Rik   |
| Gm16703        | Gm11732        | 4930500J02Rik  | Gm17246        | Gm15559         | D330023K18Rik   |
| 2610035D17Rik  | 3110056K07Rik  | 9330185C12Rik  | Gm10060        | 1700030C12Rik   | 2210408F21Rik   |
| A330076H08Rik  | Gm12898        | 2810429I04Rik  |                | Dleu2           | 4930506C21Rik   |
| 9330151L19Rik  | Gm13421        | 4930566F21Rik  |                | C330013E15Rik   | Gm15050         |
| Gm7677         | 2610307P16Rik  | C330002G04Rik  |                | Gm17633         | 2900053A13Rik   |
| Gm17605        | Gm16899        | E230016M11Rik  |                | Gm17302         | Gm17559         |
| Gm17549        | Gm13778        | Gm17557        |                | Gm17690         |                 |
| 5033417F24Rik  | 4930405A21Rik  | A230004M16Rik  |                |                 |                 |
| Gm17115        | 2810425M01Rik  | Gm17392        |                |                 |                 |
| Gm17354        | C430042M11Rik  | Gm17255        |                |                 |                 |
|                | 4933431E20Rik  | Gm17250        |                |                 |                 |
|                | 9430065F17Rik  | Gm17284        |                |                 |                 |
|                | 4933407K13Rik  | Gm17300        |                |                 |                 |
|                | 1700030G06Rik  | Gm17625        |                |                 |                 |
|                | Gm16869        | Mir1900        |                |                 |                 |
|                | Gm5091         | Gm17699        |                |                 |                 |
|                | Gm17639        | Gm17596        |                |                 |                 |
|                | D930030I03Rik  | A730099G02Rik  |                |                 |                 |
|                | D930016D06Rik  | Gm17496        |                |                 |                 |
|                | Gm17588        | 4930544I03Rik  |                |                 |                 |
|                | Mirg           |                |                |                 |                 |
|                | Gm6297         |                |                |                 |                 |
|                | Gm17279        |                |                |                 |                 |
|                | Gm17591        |                |                |                 |                 |
|                | Rian           |                |                |                 |                 |
|                | Gm17442        |                |                |                 |                 |



**Table S3, Related to Figure 4. Polycomb-bound activated lncRNAs**

|               |               |               |               |               |
|---------------|---------------|---------------|---------------|---------------|
| 4930429F24Rik | B430010I23Rik | B430010I23Rik | Gm17259       | C530005A16Rik |
| Gm14022       | 1700023H06Rik | 1700023H06Rik | A430108E01Rik | Gm15545       |
| Gm16933       | Gm17400       | Gm17400       | 1700030G06Rik | 3010001F23Rik |
| C030010L15Rik | Gm17518       | Gm17518       | B230354K17Rik | 2610206C17Rik |
| A330048O09Rik | 2610035F20Rik | 2610035F20Rik | 9830144P21Rik | A930007I19Rik |
| Gm17351       | 4930520O04Rik | 4930520O04Rik | Gm14261       | C130036L24Rik |
| Gm10492       | 1110002J07Rik | 1110002J07Rik | Gm12743       | Gm10785       |
| Gm5091        | Gm16889       | Gm16889       | 9530027J09Rik | Gm17639       |
| Gm13562       | Gm17452       | Gm17452       | Gm17516       | Mirg          |
| Gm10575       | Gm2366        | Gm2366        | B230208H11Rik | D930016D06Rik |
| Gm4890        | Gm17529       | Gm17529       | 4933427G23Rik | Gm5106        |
| C330018A13Rik | 5730420D15Rik | 5730420D15Rik | 4930509G22Rik | Gm17683       |
| Gm17115       | Gdap10        | Gdap10        | Mir706        | 2700086A05Rik |
| 1010001B22Rik | BC028777      | BC028777      | 4833417C18Rik | 4930513N10Rik |
| Gm14817       | Gm16618       | Gm16618       | 2310058D17Rik | Gm17291       |
| Gm17440       | Gm7782        | Gm7782        | 1700007J10Rik | Gm15441       |
| Gm4673        | 4930461G14Rik | 4930461G14Rik | Gm6410        | 1810019D21Rik |
| A930011O12Rik | Gm13261       | Gm13261       | Gm16624       | Gm17502       |
| Gm16641       | 6720401G13Rik | 6720401G13Rik | Gm15787       | 1700001G11Rik |
| Gm17335       | 1700086P04Rik | 1700086P04Rik | Mir1900       | 2610035D17Rik |
| 5730457N03Rik | G730013B05Rik | G730013B05Rik | Gm16973       | 2700012I20Rik |
| Gm16159       | Gm12592       | Gm12592       | Nespas        | Gm16882       |
| Gm17321       | Gm16845       | Gm16845       | Gm16096       | Gm15489       |
| Gm13110       | C430002E04Rik | C430002E04Rik | B230206L02Rik | 3110045C21Rik |
| D230017M19Rik | C330046G13Rik | C330046G13Rik | Gm11602       | Gm17637       |
| 1700016P03Rik | C330002G04Rik | C330002G04Rik | Gm17548       | Gm8098        |
| A030003K02Rik | C330013F16Rik | C330013F16Rik | C030005K06Rik | Gm17422       |
| Gm17460       | Gm10143       | Gm10143       | 1700095J07Rik | 2310002F09Rik |
| Six3os1       | Gm16892       | Gm16892       | Gm4262        | C230037L18Rik |
| Gm16972       | Gm16880       | Gm16880       | Gm10425       | A930029G22Rik |
| B430212C06Rik | 4930444M15Rik | 4930444M15Rik | Gm11769       |               |
| 2810468N07Rik | Gm17254       | Gm17254       | Gm17559       |               |
| Gm17238       | 2310043M15Rik | 2310043M15Rik | 2410133F24Rik |               |
| Gm807         | 2500002B13Rik | 2500002B13Rik | Gm16867       |               |
| D030068K23Rik | Gm2694        | Gm2694        | Gm17682       |               |
| Gm6297        | 2410003L11Rik | 2410003L11Rik | Gm17491       |               |
| F730043M19Rik | 4930500J02Rik | 4930500J02Rik | 4933407K13Rik |               |
| 2810011L19Rik | Gm10069       | Gm10069       | Gm16790       |               |
| Gm16568       | Gm11019       | Gm11019       | Sox2ot        |               |
| Gm17442       | 1810014B01Rik | 1810014B01Rik | 4930594M22Rik |               |

**Table S4, Related to Figure 7. Top 50 lncRNAs anti-correlated with *Oct4* expression**

---

|               |               |
|---------------|---------------|
| Col5a2        | Snord123      |
| Gm14005       | 7530420F21Rik |
| Gm2115        | Gm16907       |
| BC029722      | A430018G15Rik |
| 8030451A03Rik | 2810029C07Rik |
| Gm17315       | Gm16898       |
| Gm17371       | D430036J16Rik |
| Gm13372       | Gm17437       |
| Gm10561       | 1810058I24Rik |
| Ttc28         | Gm13476       |
| Gm13986       | C030005K06Rik |
| Gm16661       | Gm16596       |
| Hoxa11as      | 9930014A18Rik |
| Gm6634        | Gm17302       |
| A930001C03Rik | A830012C17Rik |
| Gm17311       | Gm16767       |
| Gm14488       | 4921504A21Rik |
| 2210408F21Rik | 1700006J14Rik |
| 2010001A14Rik | 9130206I24Rik |
| Gm16801       | 2210411M09Rik |
| 1110054M08Rik | 2010300F17Rik |
| 2810430I11Rik | 4833418N02Rik |
| Gm17698       | 5830432E09Rik |
| Gm17447       | Gm14636       |
| Gm17633       | 4932415G12Rik |

---

**Table S5, Related to Figure 7. LncRNA activation kinetics**

| <b>I. Early activation: SSEA1- cells</b> |               |           |
|------------------------------------------|---------------|-----------|
| 1010001B22Rik                            | B230206F22Rik | Gm16952   |
| 1110020A21Rik                            | B230206L02Rik | Gm16972   |
| 1500026H17Rik                            | B230208H11Rik | Gm16973   |
| 1700007J10Rik                            | B230344G16Rik | Gm16994   |
| 1700028E10Rik                            | C230037L18Rik | Gm17115   |
| 1700030G06Rik                            | D030054H15Rik | Gm17238   |
| 1700095J07Rik                            | Enox          | Gm17276   |
| 1810014B01Rik                            | Gm10069       | Gm17291   |
| 2010015M23Rik                            | Gm10575       | Gm17336   |
| 2310002F09Rik                            | Gm10785       | Gm17344   |
| 2310010J17Rik                            | Gm11019       | Gm17372   |
| 2310015A10Rik                            | Gm11538       | Gm17422   |
| 2310043M15Rik                            | Gm11613       | Gm17477   |
| 2310069G16Rik                            | Gm11638       | Gm17491   |
| 2410133F24Rik                            | Gm12059       | Gm17516   |
| 2500002B13Rik                            | Gm12592       | Gm17540   |
| 2610027K06Rik                            | Gm12743       | Gm17559   |
| 2610035D17Rik                            | Gm12898       | Gm17588   |
| 2700012I20Rik                            | Gm13657       | Gm17598   |
| 2810468N07Rik                            | Gm13830       | Gm17639   |
| 3100003L05Rik                            | Gm15545       | Gm17690   |
| 3110045C21Rik                            | Gm15559       | Gm17702   |
| 4833417C18Rik                            | Gm15888       | Gm17716   |
| 4930417H01Rik                            | Gm16244       | Gm2449    |
| 4930429F24Rik                            | Gm16617       | Gm4262    |
| 4930461G14Rik                            | Gm16641       | Gm4890    |
| 4930500J02Rik                            | Gm16685       | Gm7677    |
| 4930513N10Rik                            | Gm16703       | Gm8098    |
| 4933427G23Rik                            | Gm16733       | Gm9903    |
| 9330151L19Rik                            | Gm16761       | Mir155    |
| A030003K02Rik                            | Gm16845       | Six3os1   |
| A230056P14Rik                            | Gm16862       | Ttc28     |
| A330032B11Rik                            | Gm16867       | Zfp133-ps |
| A330076H08Rik                            | Gm16882       |           |
| A730020E08Rik                            | Gm16884       |           |
| A930029G22Rik                            | Gm16897       |           |
| AV039307                                 | Gm16898       |           |
| AW047730                                 | Gm16907       |           |

**II. Late activation: SSEA1+ cells**

|               |               |               |         |         |         |
|---------------|---------------|---------------|---------|---------|---------|
| 0610005C13Rik | 4933407K13Rik | C330002G04Rik | Gm16096 | Gm17502 | Nespas  |
| 1110002J07Rik | 4933439K11Rik | C330013F16Rik | Gm16159 | Gm17517 | Sox2ot  |
| 1500017E21Rik | 5033417F24Rik | C330018A13Rik | Gm16170 | Gm17518 | Tdrd5   |
| 1700001G11Rik | 5330411J11Rik | C330046G13Rik | Gm16233 | Gm17557 | Vax2os1 |
| 1700016P03Rik | 5330434G04Rik | C430002E04Rik | Gm16283 | Gm17561 |         |
| 1700023H06Rik | 5730405O15Rik | C430039J16Rik | Gm16568 | Gm17568 |         |
| 1700023L04Rik | 5730420D15Rik | C430042M11Rik | Gm16613 | Gm17594 |         |
| 1700026J14Rik | 5730457N03Rik | C530005A16Rik | Gm16624 | Gm17597 |         |
| 1700086O06Rik | 5930412G12Rik | D030055H07Rik | Gm16706 | Gm17625 |         |
| 1700086P04Rik | 6030442K20Rik | D030068K23Rik | Gm16790 | Gm17630 |         |
| 1810019D21Rik | 6430562O15Rik | D230017M19Rik | Gm16853 | Gm17637 |         |
| 2310058D17Rik | 6720401G13Rik | D930016D06Rik | Gm16880 | Gm17644 |         |
| 2410003L11Rik | 9230116N13Rik | D930048G16Rik | Gm16892 | Gm17656 |         |
| 2610035F20Rik | 9330185C12Rik | E030007J07Rik | Gm16899 | Gm17682 |         |
| 2700086A05Rik | 9430065F17Rik | E130018N17Rik | Gm16913 | Gm17683 |         |
| 2810425M01Rik | 9530027J09Rik | F730043M19Rik | Gm16933 | Gm17692 |         |
| 2810429I04Rik | 9530080O11Rik | G530011O06Rik | Gm16986 | Gm17699 |         |
| 3010001F23Rik | 9830144P21Rik | G730013B05Rik | Gm17246 | Gm17710 |         |
| 4732487G21Rik | A230004M16Rik | Gdap10        | Gm17250 | Gm17713 |         |
| 4833407H14Rik | A230107N01Rik | Gm10143       | Gm17255 | Gm17717 |         |
| 4921507G05Rik | A330035P11Rik | Gm10492       | Gm17259 | Gm17718 |         |
| 4930404I05Rik | A330048O09Rik | Gm10565       | Gm17317 | Gm2366  |         |
| 4930405A21Rik | A430105J06Rik | Gm10658       | Gm17321 | Gm2464  |         |
| 4930444M15Rik | A430108E01Rik | Gm11638       | Gm17322 | Gm2529  |         |
| 4930467K11Rik | A730011C13Rik | Gm11714       | Gm17335 | Gm2694  |         |
| 4930480K23Rik | A730099G02Rik | Gm11732       | Gm17351 | Gm2788  |         |
| 4930481B07Rik | A930006K02Rik | Gm11769       | Gm17357 | Gm2824  |         |
| 4930483K19Rik | A930011O12Rik | Gm12655       | Gm17392 | Gm4349  |         |
| 4930509E16Rik | A930024E05Rik | Gm13110       | Gm17400 | Gm4673  |         |
| 4930509G22Rik | Abhd1         | Gm13261       | Gm17418 | Gm5091  |         |
| 4930520O04Rik | Al854517      | Gm13562       | Gm17440 | Gm5101  |         |
| 4930526L06Rik | B230206H07Rik | Gm13778       | Gm17442 | Gm5106  |         |
| 4930532G15Rik | B230354K17Rik | Gm14022       | Gm17460 | Gm6297  |         |
| 4930544I03Rik | B430010I23Rik | Gm14261       | Gm17461 | Gm6410  |         |
| 4930556M19Rik | B430212C06Rik | Gm14817       | Gm17463 | Gm6846  |         |
| 4930566F21Rik | BC028777      | Gm15441       | Gm17470 | Gm807   |         |
| 4930583K01Rik | BC046401      | Gm15787       | Gm17478 | Gm8378  |         |
| 4930594M22Rik | C030005K06Rik | Gm16023       | Gm17481 | Kis2    |         |
| 4933404O12Rik | C030010L15Rik | Gm16046       | Gm17496 | Mir1900 |         |
| 4933405D12Rik | C130036L24Rik | Gm16065       | Gm17501 | Mirg    |         |
